# Supplementary material for: Stemness-Attenuating miR-503-3p as a Paracrine Factor to Regulate Growth of Cancer Stem Cells
Source: Hindawi journal article supplement (doi:10.1155/2018/4851949), 2018-01-01
Supplement: f1 [file 4851949.f1.pdf]

## Supplementary Materials

### Supplementary Figure 1

A

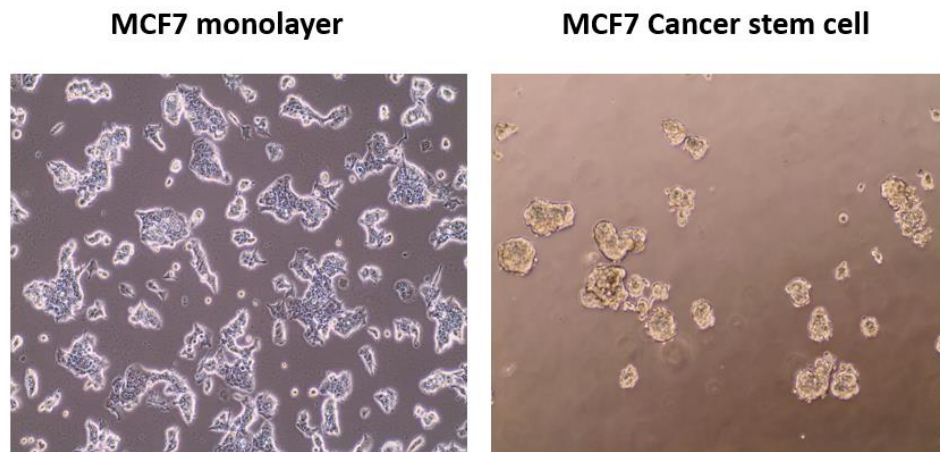

B

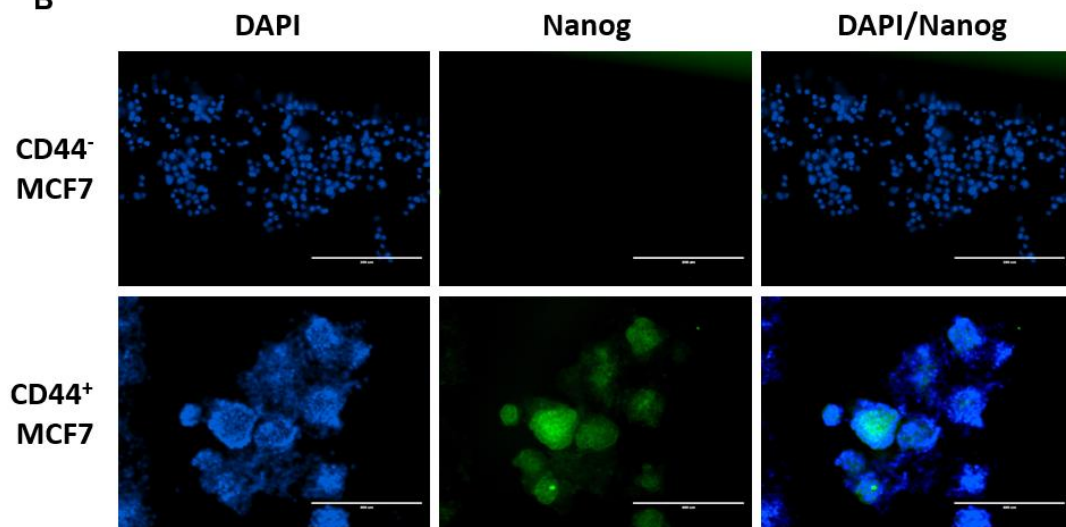

**Supplementary Figure 1. Characterization of isolated CD44<sup>+</sup> CSCs.** (A) MCF7 monolayer cells and isolated MCF7 CSCs using CD44-positive magnetic beads are shown. (B) Confocal microscopic images revealed the expression of Nanog as a stemness marker. The bars indicate 400  $\mu$ m. The nucleus was visualized by DAPI staining.
